# Supplementary material for: Assessing Molecular Docking Tools to Guide the Design of Polymeric Materials Formulations: A Case Study of Canola and Soybean Protein
Source: MDPI journal article supplement (doi:10.3390/polym14173690), 2022-09-05
Supplement: s1 [file s1]

**Supplementary Information for**

**Assessing Molecular Docking Tools to Guide the Design of**

**Polymeric Materials Formulations: A Case Study of Canola and Soybean Protein**

Frage Abookleesh<sup>†</sup>, Farag E.S. Mosa<sup>‡</sup>, Khaled Barakat<sup>‡</sup>, Aman Ullah<sup>\*†</sup>

<sup>‡</sup>Faculty of Pharmacy & Pharmaceutical Sciences, University of Alberta, Edmonton, AB,  
Canada T6G 2H5

<sup>†</sup>Department of Agricultural, Food and Nutritional Science, University of Alberta, Edmonton,  
AB, Canada T6G 2P5

<sup>\*</sup>Corresponding author. Tel: +1 (780) 492-4845. E-mail: ullah2@ualberta.ca (Aman Ullah)

**Table S1: Protein-additive interaction profile**

| Additives       | Canola protein |              |                |              | Soybean protein |              |                |              |                                  |
|-----------------|----------------|--------------|----------------|--------------|-----------------|--------------|----------------|--------------|----------------------------------|
|                 | Residue        | Distance (Å) | Bonds Involved | Interactions | Residue         | Distance (Å) | Bonds Involved | Interactions | Interacting Atom/Group of Ligand |
| (1) Water       | ASN 341C       | 1.99         | O-H-O          | HB           | SER 63 B        | 2.10         | O-H-O          | HB           | Oxygen                           |
|                 | ASN 341C       | 2.60         | O-H-O          | HB           | SER 63 B        | 2.54         | O-H-O          | HB           | Oxygen                           |
|                 | GLY383 C       | 2.14         | O-H-O          | HB           | GLY 128 B       | 2.59         | O-H-O          | HB           | Oxygen                           |
|                 | PHE 384 C      | 2.97         | O-H-O          | HB           | VAL 129 B       | 2.58         | O-H-O          | HB           | Oxygen                           |
|                 |                |              |                |              |                 |              |                |              |                                  |
| Formamide       | ASN 311D       | 2.55         | O-H-O          | HB           | ASN 325 A       | 2.10         | O-H-O          | HB           | Oxygen                           |
|                 | SER 324D       | 2.32         | O-H-O          | HB           | LYS 330 A       | 2.75         | N-H-O          | HB           | Oxygen/Nitrogen                  |
|                 | ALA 325D       | 2.22         | O-H-O          | HB           | GLU 324 A       | 2.34         | O-H-O          | HB           | Carbon                           |
|                 | THR 309D       | 2.55         | O-H-O          | HB           | ASN 355 B       | 2.69         | O-H-O          | HB           | Carbon                           |
|                 | ALA 406D       | 2.21         | N-H-O          | HB           | THR 358 B       | 2.70         | O-H-O          | HB           | Oxygen/Nitrogen                  |
|                 |                |              |                |              |                 |              |                |              |                                  |
| Ethylene glycol | CYS 40D        | 2.02         | O-H-O          | HB           | CYS 327 A       | 2.07         | O-H-O          | HB           | Oxygen                           |
|                 | CYS 40D        | 2.19         | O-H-O          | HB           | GLU 323 A       | 2.72         | O-H-O          | HB           | Oxygen                           |
|                 | ASN 345D       | 2.33         | O-H-O          | HB           | LYS 113 A       | 2.50         | O-H-O          | HB           | Oxygen                           |
|                 |                |              |                |              | ARG 115A        | 3.72         | O-H-O          | HB           | Oxygen                           |
|                 |                |              |                |              |                 |              |                |              |                                  |
| Urea            | PHE 232D       | 2.55         | O-H-N          | HB           | PRO 86 A        | 2.35         | N-H-O          | HB           | Nitrogen                         |
|                 | GLY 413E       | 3.27         | N-H-O          | HB           | THR 88 A        | 2.75         | N-H-O          | HB           | Nitrogen                         |
|                 | ARG 419E       | 2.93         | N-H-O          | HB           | GLN 323A        | 2.25         | O-H-O          | HB           | Oxygen                           |
|                 | ARG 439E       | 3.04         | O-H-N          | HB           | GLU323 A        | 2.18         | N-H-O          | HB           | Oxygen                           |
|                 | VAL 440E       | 2.85         | O-H-N          | HB           | THR 328 A       | 2.00         | N-H-O          | HB           | Nitrogen                         |
|                 | THR 440 E      | 2.45         | O-H-N          | HB           | ASP 342 A       | 2.34         | N-H-O          | HB           | Nitrogen                         |
|                 |                |              |                |              |                 |              |                |              |                                  |
| Glycerol        | LEU 181 F      | 1.81         | O-H-O          | HB           | ASP 342 A       | 2.52         | O-H-O          | HB           | Oxygen                           |
|                 | LEU 181 F      | 2.06         | O-H-O          | HB           | ARG 340 A       | 3.16         | O-H-O          | HB           | Oxygen                           |
|                 | ASN 186 F      | 3.06         | O-H-O          | HB           | ASP 121 A       | 2.11         | O-H-O          | HB           | Oxygen                           |
|                 | ASN 186 F      | 2.12         | O-H-O          | HB           | ASN 334 A       | 3.05         | O-H-O          | HB           | Oxygen                           |
|                 |                |              |                |              | GLN 333A        | 2.16         | O-H-O          | HB           | Oxygen                           |

|                 |           |      |            |    |           |      |            |                 |                |
|-----------------|-----------|------|------------|----|-----------|------|------------|-----------------|----------------|
|                 |           |      |            |    |           |      |            |                 |                |
| Triethanolamine | ASN186 B  | 2.76 | O-H-O      | HB | HIS 332 B | 2.17 | O-H-O      | HB              | Oxygen         |
|                 | GLN187 B  | 2.35 | O-H-O      | HB | LEU 331 B | 1.96 | O-H-O      | HB              | Oxygen         |
|                 | ARG 190 B | 2.44 | N-H-O      | HB | LYS 113 B | 2.28 | O-H-O      | HB              | Oxygen         |
|                 | ASN 345 C | 2.47 | O-H-O      | HB | SER 339 A | 2.17 | O-H-O      | HB              | Oxygen         |
|                 | CYS 40C   | 1.89 | O-H-O      | HB | ASP 342 A | 2.73 | O-H-O      | HB              |                |
|                 | ALA 182 C | 3.83 | C-C        | HP |           |      |            |                 | Carbon         |
|                 |           |      |            |    |           |      |            |                 |                |
| Sorbitol        | ILE 208 F | 2.64 | O-H-O      | HB | THR 358 A | 2.12 | O-H-O      | HB              | Oxygen         |
|                 | GLU 209 F | 2.19 | O-H-O      | HB | THR 328 B | 1.82 | O-H-O      | HB              | Oxygen         |
|                 | ASP 32 F  | 2.35 | O-H-O      | HB | LYS 113 B | 2.47 | O-H-O      | HB              | Carbon         |
|                 | HIS 34 B  | 2.15 | O-H-O      | HB | ARG 340 A | 2.24 | O-H-O      | HB              | Oxygen         |
|                 | HIS 19 B  | 2.31 | O-H-O      | HB | ASN 334 A | 2.30 | O-H-O      | HB              | Oxygen         |
|                 | TRP 207 B | 2.47 | O-H-O      | HB | ASP 342 A | 2.21 | O-H-O      | HB              | Oxygen         |
|                 | ARG 190 D | 2.22 | O-H-O      | HB | LYS 353 A | 3.48 | C-C        | HP              | Carbon         |
|                 |           |      |            |    | SER 352A  | 3.09 | C-C        | HP              | Carbon         |
|                 |           |      |            |    |           |      |            |                 |                |
|                 |           |      |            |    |           |      |            |                 |                |
| Phthalate       | ASN 343D  | 2.03 | O-H-O      | HB | LEU 331 A | 2.58 | O-H-O      | HB              | Oxygen         |
|                 | ASN 403D  | 2.77 | O-H-O      | HB | HIS 332 A | 3.28 | O-H-O      | HB              | Oxygen         |
|                 | GLN 158F  | 3.88 | O-H-O      | HB | LYS 330A  | 3.72 | C-C        | HP              | Oxygen/ Carbon |
|                 | GLN 407D  | 3.98 | C-C        | HP | THR 358 B | 3.82 | C-C        | HP              | aromatic       |
|                 | HIS 158 F | 3.88 | C-aromatic | SB | LYS 113 A | 3.57 | C-aromatic | SB              | Carboxylate    |
|                 |           |      |            |    | ARG115 A  | 3.94 | C-aromatic | SB              | Carboxylate    |
|                 |           |      |            |    | Lys 113 A | 3.69 | C-C ring   | $\pi$ -stacking | Aromatic       |
|                 |           |      |            |    |           |      |            |                 |                |
| Glyoxal         | SER 18 B  | 2.93 | O-H-O      | HB | THR 88 A  | 2.22 | O-H-O      | HB              | Oxygen         |
|                 | ASP 32 B  | 2.12 | O-H-O      | HB | LYS 113 A | 2.10 | O-H-O      | HB              | Oxygen         |
|                 | GLN 213 F | 2.81 | O-H-O      | HB |           |      |            |                 |                |
|                 |           |      |            |    |           |      |            |                 |                |
| Glutaraldehyde  | HIS 158 B | 2.19 | O-H-O      | HB | LYS 113 B | 3.58 | O-H-O      | HB              | Oxygen         |
|                 | GLU 280 B | 2.77 | O-H-O      | HB | ARG 115 B | 3.34 | O-H-O      | HB              | Oxygen         |
|                 | VAL 80 B  | 3.69 | C-C        | HP | THR 88B   | 3.53 | C-C        | HP              | Carbon         |
|                 | HIS 158 B | 3.68 | C-C        | HP | GLN 112 B | 3.86 |            | HP              | Carbon         |

|                  |           |      |            |    |           |      |            |    |          |
|------------------|-----------|------|------------|----|-----------|------|------------|----|----------|
|                  | VAL 161 B | 3.66 | C-C        | HP | LYS 113 B | 3.45 | C-C        | HP | Carbon   |
|                  |           |      |            |    |           |      |            |    |          |
| maleic anhydride | TYR 196 B | 2.93 | O-H-O      | HB | LYS 113 A | 2.92 | O-H-O      | HB | Oxygen   |
|                  | TYR 196 B | 3.10 | O-H-O      | HB | ARG 115 A | 3.51 | O-H-O      | HB | Oxygen   |
|                  | TYR 56 B  | 2.85 | O-H-O      | HB | GLU 323 A | 3.25 | O-H-O      | HB | Oxygen   |
|                  | VAL 46 B  | 3.75 | C-aromatic | HP | THR 88A   | 3.41 | C-aromatic | HP | aromatic |
|                  | VAL 46 B  | 3.72 | C-aromatic | HP | THR 88A   | 3.72 | C-aromatic | HP | aromatic |
|                  | PHE 61 B  | 3.70 | C-aromatic | HP |           |      |            |    |          |
|                  |           |      |            |    |           |      |            |    |          |
| Citric Acid      | LEU 188 B | 3.35 | O-H-O      | HB | LYS 113 B | 2.07 | O-H-O      | HB | Oxygen   |
|                  | HIS 184 B | 2.25 | O-H-O      | HB | GLU 333A  | 2.14 | O-H-O      | HB | Oxygen   |
|                  | LUE 188 B | 3.15 | O-H-O      | HB | ARG 340 A | 2.25 | O-H-O      | HB | Oxygen   |
|                  | ARG 190 B | 2.44 | O-H-O      | HB | ASP 342 A | 1.81 | O-H-O      | HB | Oxygen   |
|                  | ARG 190 C | 2.33 | O-H-O      | HB | ASN334 A  | 2.74 | O-H-O      | HB | Oxygen   |
|                  |           |      |            |    |           |      |            |    |          |
| Genipin          | CYS 40 E  | 2.25 | O-H-O      | HB | ASN 334 A | 3.07 | O-H-O      | HB | Oxygen   |
|                  | ARG 190 D | 2.40 | O-H-O      | HB | THR 353 A | 1.74 | O-H-O      | HB | Oxygen   |
|                  | ASN 345 E | 2.77 | O-H-O      | HB | ARG 115 B | 2.85 | O-H-O      | HB | Oxygen   |
|                  | GLN 187 D | 3.58 | O-H-O      | HB | LYS 330 B | 3.71 | C-C        | HP | Carbon   |
|                  | GLN 187 D | 3.20 | C-C        | HP | ARG 340 A | 3.52 | C-C        | HP | Carbon   |
|                  | ALA 182 E | 3.65 | C-C        | HP | THR 358 A | 3.65 | C-C        | HP | Carbon   |
|                  |           |      |            |    |           |      |            |    |          |
| Tannic Acid      | GLN 1 C   | 3.13 | O-H-O      | HB | LYS 75 A  | 3.38 | O-H-O      | HB | Oxygen   |
|                  | ASP 10 C  | 3.39 | O-H-O      | HB | HIS 116 B | 2.79 | O-H-O      | HB | Oxygen   |
|                  | ASP 10 F  | 1.88 | O-H-O      | HB | LYS 330 A | 1.98 | O-H-O      | HB | Oxygen   |
|                  | GLN 11C   | 2.34 | O-H-O      | HB | HIS 332 A | 3.44 | O-H-O      | HB | Oxygen   |
|                  | GLN 11 F  | 2.30 | O-H-O      | HB | ARG 350 B | 2.89 | O-H-O      | HB | Oxygen   |
|                  | ALA 14 C  | 2.00 | O-H-O      | HB | GLN 333 A | 2.25 | O-H-O      | HB | Oxygen   |
|                  | ARG211 B  | 2.75 | O-H-O      | HB | ARG 337 A | 2.51 | O-H-O      | HB | Oxygen   |
|                  | GLN 214 E | 2.14 | O-H-O      | HB | SER 339 B | 2.31 | O-H-O      | HB | Oxygen   |
|                  | LYS 217 E | 2.99 | O-H-O      | HB | ASN 334 A | 2.59 | O-H-O      | HB | Oxygen   |
|                  | GLN 214 B | 3.00 | O-H-O      | HB | VEN 117 B | 3.28 | O-H-O      | HB | Oxygen   |
|                  | ASN 221 E | 2.47 | O-H-O      | HB | ARG 340 B | 3.20 | O-H-O      | HB | Oxygen   |
|                  | GLN 245 E | 2.16 | O-H-O      | HB | ARG 350 B | 2.89 | O-H-O      | HB | Oxygen   |
|                  | ARG 366 F | 2.48 | O-H-O      | HB | ASN 118 A | 3.54 | C-H        | HP | Oxygen   |



|         |           |       |       |    |           |       |       |    |               |
|---------|-----------|-------|-------|----|-----------|-------|-------|----|---------------|
| Agar    | ALA 182 B | 2.21  | O-H-O | HB | ASN 118B  | 2.03  | O-H-O | HB | Oxygen        |
|         | HIS 184 B | 3.73  | N-H-O | HB | HIS 332 B | 2.17  | N-H-O | HB | Oxygen        |
|         | ARG 190 B | 2.31  | N-H-O | HB | LYS 330 B | 2.38  | N-H-O | HB | Oxygen        |
|         | ARG 190 B | 3.30  | N-H-O | HB | ARG 337 B | 1.99  | N-H-O | HB | Oxygen/Carbon |
|         | ARG 190 C | 2.72  | N-H-O | HB | ARG 337 B | 3.22  | O-H-O | HB | Oxygen        |
|         | ARG 322 B | 2.33  | N-H-O | HB | SER 339 A | 2.06  | O-H-O | HB | Oxygen        |
|         | HIS 184 B | 3.82  | C-N   | HP | ARG 340 B | 3.15  | N-H-O | HB | Carbon        |
|         | SER 183 B | 3.35  | C-N   | HP | ASN 334 B | 3.67  | C-C   | HP | Carbon        |
|         | GLU 6 C   | 3.89  | C-C   | HP | ARG 340 A | 3.99  | O-N   | SB | Oxygen        |
|         |           |       |       |    |           |       |       |    |               |
| kefiran | GLU 6 D   | 2.61  | O-H-O | HB | ASN 118 B | 2.97  | N-H-O | HB | Oxygen        |
|         | GLU 6 D   | 2.70  | O-H-O | HB | ASN 118 B | 3.13  | O-H-O | HB | Oxygen        |
|         | GLU 6 D   | 2.97  | O-H-O | HB | ASP 121 B | 3.63  | O-H-O | HB | Oxygen        |
|         | LEU 181 F | 2.20  | O-H-O | HB | ASP 121 A | 3.57  | O-H-O | HB | Oxygen        |
|         | ASN 186 F | 3.01  | N-H-O | HB | LYS 330 A | 2.54  | N-H-O | HB | Oxygen        |
|         | ASN 186 F | 1.95  | O-H-O | HB | LYS 330 B | 2.08  | N-H-O | HB | Oxygen        |
|         | GLN 187 F | 2..05 | O-H-O | HB | HIS 332 A | 2.11  | O-H-O | HB | Oxygen        |
|         | GLN 187 F | 3.05  | N-H-O | HB | HIS 332 B | 3.19  | O-H-O | HB | Oxygen        |
|         | LEU 188 F | 2.34  | O-H-O | HB | GLN 33A   | 2.21  | O-H-O | HB | Oxygen        |
|         | ARG 190 F | 2.35  | N-H-O | HB | ASN 334 B | 2.61  | N-H-O | HB | Oxygen        |
|         | ASN 345 D | 3.16  | N-H-O | HB | ARG 337 A | 2.60  | N-H-O | HB | Oxygen        |
|         | ALA 182 D | 3.98  | C-C   | HP | ARG 337 B | 3.40  | N-H-O | HB | Carbon/Oxygen |
|         | ARG 190 F | 3.78  | C-C   | HP | ARG 337 A | 3.28  | N-H-O | HB | Carbon/Oxygen |
|         |           |       |       |    | ARG 340 A | 2.30` | N-H-O | HB | Oxygen        |
|         |           |       |       |    | ARG 340 B | 3.19  | N-H-O | HB | Oxygen        |
|         |           |       |       |    | ARG 340 B | 3.70  | C-N   | SB | Carbon        |
|         |           |       |       |    | ARG 337 A | 3.90  | C-N   | SB | Carbon        |
|         |           |       |       |    |           |       |       |    |               |
| lignin  | SER 312 B | 2.34  | O-H-O | HB | ASN 118 A | 3.18  | N-H-O | HB | Oxygen        |
|         | ARG 319 A | 2.46  | N-H-O | HB | ASN 118 B | 3.23  | N-H-O | HB | Oxygen        |
|         | ARG 322 A | 3.36  | N-H-O | HB | ASP 121 B | 2.17  | O-H-O | HB | Oxygen        |
|         | ARG 322 B | 3.00  | N-H-O | HB | LYS 250 A | 2.68  | N-H-O | HB | Oxygen        |
|         | ARG 322C  | 3.14  | N-H-O | HB | TRP 251 A | 3.14  | N-H-O | HB | Oxygen        |
|         | ARG 322 C | 2.69  | N-H-O | HB | LYS 330 A | 2.57  | N-H-O | HB | Oxygen        |
|         | ASN 343 C | 2.25  | N-H-O | HB | LYS 330 B | 3.21  | N-H-O | HB | Oxygen        |

|         |           |      |       |    |           |      |       |    |               |
|---------|-----------|------|-------|----|-----------|------|-------|----|---------------|
|         | ASN 403 C | 2.40 | N-H-O | HB | HIS 332 B | 3.00 | N-H-O | HB | Oxygen        |
|         | ALA 404 A | 2.14 | N-H-O | HB | GLN 333 B | 2.28 | O-H-O | HB | Oxygen        |
|         | ASN 405 B | 2.98 | N-H-O | HB | ASN 334 B | 1.90 | N-H-O | HB | Oxygen        |
|         | ARG 319 B | 3.45 | O-C   | HP | ARG 337 B | 2.56 | N-H-O | HB | Oxygen        |
|         | PHE 320 B | 3.99 | C-C   | HP | SER 339 B | 3.23 | O-H-O | HB | Carbon/Oxygen |
|         | ARE 322 A | 3.95 | C-C   | HP | ARG 340 A | 3.13 | N-H-O | HB | Carbon/Oxygen |
|         | ASN 405 B | 3.78 | O-C   | HP | ARG 340 B | 3.36 | O-H-O | HB | Carbon/Oxygen |
|         |           |      |       |    | GLN 440 A | 2.39 | O-H-O | HB | Carbon/Oxygen |
|         |           |      |       |    | LYS 250 A | 3.85 | C-C   | HP | Carbon        |
|         |           |      |       |    | ALA 336 B | 3.74 | C-C   | HP | Carbon        |
|         |           |      |       |    | PRO 338 B | 3.87 | C-C   | HP | Carbon        |
| Dextran | GLU 6 E   | 2.67 | O-H-O | HB | HIS 116 A | 3.73 | O-H-O | HB | Oxygen        |
|         | GLU 6 E   | 2.43 | O-H-O | HB | ASN 118 A | 2.07 | O-H-O | HB | Oxygen        |
|         | ASN 186 D | 3.62 | O-H-O | HP | ASN 118 B | 2.09 | N-H-O | HB | Oxygen        |
|         | GLN 187 D | 2.81 | O-H-O | HP | ASP 121 B | 3.03 | O-H-O | HB | Oxygen        |
|         | GLN 187 D | 2.72 | N-H-O | HB | LYS 330 A | 3.15 | N-H-O | HB | Oxygen        |
|         | LEU 188 D | 2.73 | N-H-O | HB | LYS 330 B | 3.1  | N-H-O | HB | Oxygen        |
|         | ARG 190 D | 3.07 | N-H-O | HP | HIS 332 A | 2.23 | N-H-O | HB | Oxygen        |
|         | ARG 190 D | 3.19 | N-H-O | HP | HIS 332 B | 2.26 | N-H-O | HB | Oxygen        |
|         | ARG 322 E | 2.82 | N-H-O | HB | GLN 333 A | 2.72 | O-H-O | HB | Oxygen        |
|         | ASN 345 E | 2.83 | N-H-O | HB | GLN 333 B | 2    | O-H-O | HB | Oxygen        |
|         | THR 402 E | 3.48 | N-H-O | HB | ASN 334 A | 1.95 | N-H-O | HB | Oxygen        |
|         |           |      |       |    | ASN 334 B | 2    | N-H-O | HP | Oxygen        |
|         |           |      |       |    | ARG 337 A | 1.96 | N-H-O | HP | Oxygen        |
|         |           |      |       |    | ARG 337 B | 2.85 | N-H-O | HP | Oxygen        |
|         |           |      |       |    | SER 339 A | 3.47 | O-H-O | HB | Oxygen        |
|         |           |      |       |    | SER 339 B | 2.27 | O-H-O | HB | Oxygen        |
|         |           |      |       |    | ARG 340 A | 2.58 | N-H-O | HB | Oxygen        |
|         | ILE 282 C | 2.44 | O-H-O | HB | GLN 440 A | 2.11 | O-H-O | HB | Oxygen        |
|         | GLU 280 C | 2.66 | N-H-O | HB | GLN 119 A | 2.07 | O-H-O | HB | Oxygen        |
|         | GLN 407 A | 2.48 | N-H-O | HB | LYS 250 A | 2.26 | N-H-O | HB | Oxygen        |
|         | ASN 343 A | 2.47 | N-H-O | HB | ASN 118 A | 2.53 | N-H-O | HB | Oxygen        |
|         | ASN 403 A | 2.23 | N-H-O | HB | ASN 118 A | 2.29 | N-H-O | HB | Oxygen        |

|          |           |      |       |    |           |       |       |    |        |
|----------|-----------|------|-------|----|-----------|-------|-------|----|--------|
| Chitosan | ARG 319 A | 3.43 | N-H-O | HB | ASN 118 A | 23.18 | O-H-O | HB | Oxygen |
|          | ASN 405 B | 2.63 | N-H-O | HB | ASN 118 B | 2.89  | N-H-O | HB | Oxygen |
|          | ASN 343 B | 3.25 | N-H-O | HB | ARG 337 B | 2.06  | N-H-O | HB | Oxygen |
|          | HIS 158 A | 2.44 | N-H-O | HB | ARG 337 B | 2.02  | N-H-O | HB | Oxygen |
|          | GLN 407 B | 2.48 | N-H-O | HB | ARG 337 B | 2.27  | N-H-O | HB | Oxygen |
|          | GLN 407 B | 3.01 | O-H-O | HB | GLY 74 A  | 2.87  | O-H-O | HB | Oxygen |
|          | HIS 184 A | 3.37 | N-H-O | HB | THR 395 A | 3.65  | O-H-O | HB | Oxygen |
|          | ARG 322 A | 3.45 | N-H-O | HB | LYS 250 A | 3.60  | N-O   | SB | Oxygen |
|          | THR 402 A | 2.99 | O-H-O | HB |           |       |       |    |        |
|          | TYR 313 B | 2.19 | O-H-O | HB |           |       |       |    |        |



**Table S2: Predicted binding sites of 11S globulin plant protein obtained by the different docking routines.**

| Plant protein             | Docking tool            | Ligand           | Binding score<br>Kcal/mol | Residue active sites                                                                                                                                                                                                  | Ref  |
|---------------------------|-------------------------|------------------|---------------------------|-----------------------------------------------------------------------------------------------------------------------------------------------------------------------------------------------------------------------|------|
| Soy glycinin A3B4 subunit | Vina                    | Glycerol         | -4.3                      | TH487, GLN110, THR326, PHE8, LYS111                                                                                                                                                                                   | [55] |
| Soy glycinin A3B4 subunit | Vina                    | Sorbitol         | -5.5                      | LYS11, LYS328, SER350, THR351, THR357 LEU352                                                                                                                                                                          | [55] |
| Soy glycinin A3B4 subunit | SYBLY                   | C3G              | NA                        | SER90, ASP282, THR82, GLU84, PRO86, GLN88, SER242, PRO243, GLU281 and GLU283                                                                                                                                          | [45] |
| grape seed 11S globulins  | Vina                    | mv3glc)          | -7.6 /-8.1                | GLN 235, ASN 227, ARG 299, GLY 267, ASN 219, ARG 2010, PRO 208                                                                                                                                                        | [56] |
| soy glycinin A3B4 subunit | Schrödinger<br>Glide    | EGCG             | -9.663                    | GLU172, HIS173, VAL162, GLY202                                                                                                                                                                                        | [57] |
| soy glycinin A3B4 subunit | AutoDock4.2.6           | EGCG             | -9.21                     | Gln73, Glu119, Glu139, Tyr371, Tyr393, Arg418 and Glu440                                                                                                                                                              | [58] |
| soy glycinin A3B4 subunit | CHARMM<br>force field   | ECCG/ catechin   |                           | ARG 418, TYR371, GLU31, ARG22, LY49, TYR 293, ARG18, VAL 404, PRO382, LEU 473                                                                                                                                         | [59] |
| 11S seed globulin         | AutoDock<br>Tools-1.5.6 | Curcumin         | -5.85                     | ARG158, TYR161, GLN168, ARG158, ARG159, PHE160, TYR161, IS166, GLU167, GLN168, LN176, ASN188 and ASN189                                                                                                               | [60] |
|                           |                         | Quercetin        | -5.66                     | ARG158, TYR161, GLN176, ARG158, PHE160, TYR161, HIS166, GLU167, GLN168, GLN176, ASN188 and ASN189, ARG158, PHE160 and ASN188                                                                                          | [60] |
|                           |                         | Resveratrol      | 5.64                      | TYR161, GLN181, PHE160, TYR161, HIS166, GLU167, GLN168, LEU171, GLY178, GLY179, GLN181 and ASN188                                                                                                                     | [60] |
| 11S seed globulin         | PatchDock<br>algorithm  | anthocyanins     | -40.52                    | Ser151, Leu152, Glu153, Asn154, Gln155, Gly47, Asp148, Asn150, Ser151, Leu152, Arg337, Asn358, Ala359, Gln397, Thr417, Asn418, Asp419, Asn150, Leu152, Glu153, Asn154, Gln155, Trp335, Arg337, Asn358, Asn418, Asp419 | [61] |
| 11S seed globulin         | CHARMm<br>forcefield    | proanthocyanidin | -50.56 kcal/mol           | Leu 58, Pro 93, Glu 95, Leu 162, Trp 129, Val 82, Val 127, Pro 61, Arg 102, Arg 103, Arg 60, Ala 163, Glu 218, Gly 164, Arg 212, Gly 215, Asn 189, Leu 213, Phe 203, Phe 191                                          | [62] |

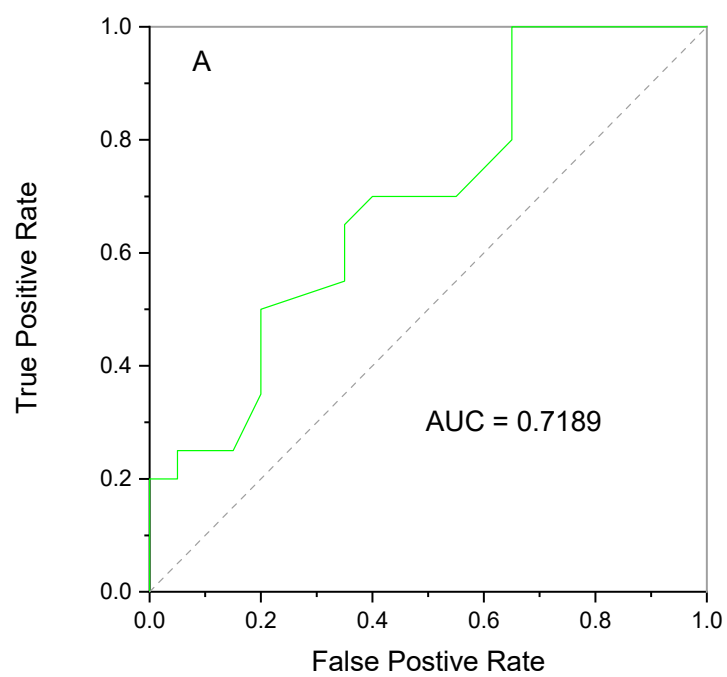

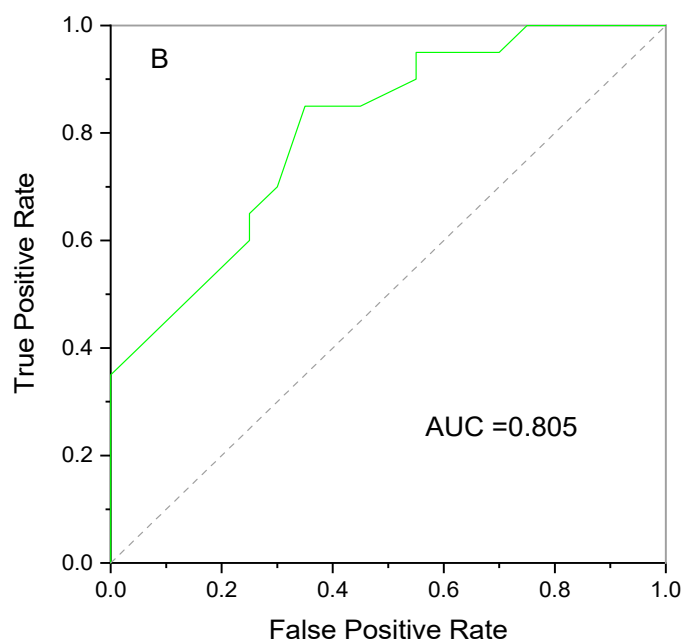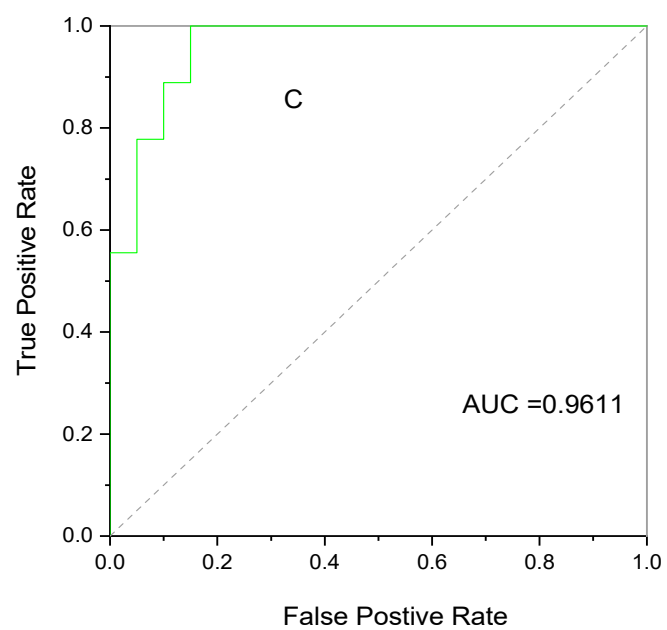

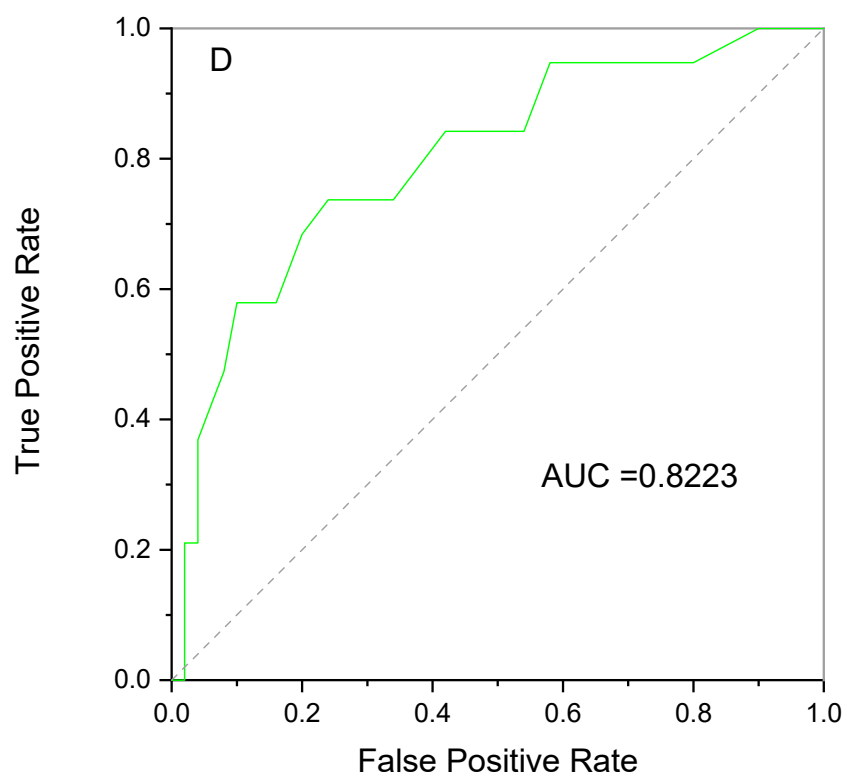

Figure S1: ROC curves for docked canola- phthalate (A), soybean- phthalate (B), soybean-citric Acid (C) and canola-citric Acid (D) by AutoDock Vina
